# Supplementary material
Source: PubMed Central journal article supplement (PMC3915513)
Supplement: NIHMS551549-supplement-1_si_001.pdf [file NIHMS551549-supplement-1_si_001.pdf]

## Supporting Information

### Versatile Reactivity of a Solvent-Coordinated Diiron(II) Compound: Synthesis and Dioxygen Reactivity of a Mixed Valent Fe<sup>II</sup>Fe<sup>III</sup> Species

Amit Majumdar,<sup>†</sup> Ulf-Peter Apfel,<sup>†</sup> Yunbo Jiang,<sup>‡</sup> Pierre Moënne-Loccoz<sup>‡\*</sup> and Stephen J. Lippard<sup>†\*</sup>

<sup>†</sup>*Department of Chemistry, Massachusetts Institute of Technology, Cambridge, Massachusetts 02139*

<sup>‡</sup>*Department of Science and Engineering, School of Medicine, Oregon Health and Science UniVersity, Beaverton, Oregon 97006*

*E-mail: plocco@ebs.ogi.edu; lippard@mit.edu*

| <b>contents</b>                                                                                                                                                                                      | <b>page numbers</b> |
|------------------------------------------------------------------------------------------------------------------------------------------------------------------------------------------------------|---------------------|
| Table S1. Selected distances (Å)                                                                                                                                                                     | 2                   |
| Table S2. Selected angles (°)                                                                                                                                                                        | 3                   |
| Figure S1. Absorption spectroscopic signatures for selected compounds                                                                                                                                | 3                   |
| Figure S2. <sup>57</sup> Fe Mössbauer spectra of <b>5</b> at r.t.                                                                                                                                    | 4                   |
| Figure S3. EPR spectra of <b>5</b> in DMF/MeCN (1:1) at 4K.<br>Conditions: [ <b>5</b> ] = 0.2 mM, 9.39 GHz MW frequency, 20 mW micro-wave power, 10 G modulation amplitude, and 0.2 s time constant. | 4                   |

**Table S1.** Selected distances (Å).<sup>†</sup>

|                       | Fe—Fe                                                                                                  | Fe—O <sub>μ-COO<sup>-</sup></sub>               | Fe—O <sub>μ-aqua</sub> | Fe—O <sub>μ-OH</sub>                                                                         | Fe—O <sub>μ-O</sub>                                                                          | Fe—O <sub>DMF</sub>                         | Fe—O <sub>Ligand</sub>                       | Fe—N <sub>Ligand</sub>                                                                                                     |
|-----------------------|--------------------------------------------------------------------------------------------------------|-------------------------------------------------|------------------------|----------------------------------------------------------------------------------------------|----------------------------------------------------------------------------------------------|---------------------------------------------|----------------------------------------------|----------------------------------------------------------------------------------------------------------------------------|
| <b>1</b>              | 3.716                                                                                                  | -----                                           | -----                  | -----                                                                                        | -----                                                                                        | 2.115(2)<br>2.373(2)<br>2.128(2)<br>2.21(3) | 2.0121(19)<br>2.0626(19)                     | 2.329(2) 2.163(3)<br>2.169(2) 2.300(2)<br>2.109(2) 2.187(2)                                                                |
| <b>2</b>              | 3.635                                                                                                  | -----                                           | -----                  | -----                                                                                        | -----                                                                                        | -----                                       | 1.997(2)<br>2.005(2)                         | 2.287(2) 2.189(3)<br>2.136(3) 2.280(2)<br>2.138(3) 2.123(3)                                                                |
| <b>3</b>              | 3.500                                                                                                  | 2.029(4)<br>2.059(3)                            | -----                  | -----                                                                                        | -----                                                                                        | -----                                       | 1.954(4)<br>1.991(3)                         | 2.293(4) 2.069(4)<br>2.066(4) 2.321(4)<br>2.070(5) 2.068(4)                                                                |
| <b>4</b>              | 3.453                                                                                                  | 2.0424(16)<br>2.0435(16)                        | -----                  | -----                                                                                        | -----                                                                                        | -----                                       | 1.9655(16)<br>1.9770(16)                     | 2.0785(19)<br>2.3069(19)<br>2.065(2) 2.0765(19)<br>2.2930(19)<br>2.0468(19)                                                |
| <b>5<sup>‡</sup></b>  | 3.575<br>3.582                                                                                         | 1.947(2)<br>2.069(2)                            | -----                  | -----                                                                                        | -----                                                                                        | 2.037(2)<br>2.070(2)                        | 1.929(2)<br>2.047(2)                         | 2.269(2) 2.097(3)<br>2.104(2) 2.262(3)<br>2.160(3) 2.125(3)<br>2.267(3) 2.245(3)                                           |
| <b>6</b>              | 3.774                                                                                                  | -----                                           | -----                  | -----                                                                                        | -----                                                                                        | 2.051(2)                                    | 1.989(2)<br>2.104(2)                         | 2.069(3) 2.138(3)<br>2.102(3) 2.100(3)                                                                                     |
| <b>7</b>              | 3.530<br>3.522<br>3.597 <sup>a</sup><br>3.636 <sup>a</sup><br>3.098 <sup>b</sup><br>3.342 <sup>c</sup> | -----                                           | -----                  | 1.973(4)<br>2.004(4)<br>1.953(4)<br>1.994(4)<br>1.956(4)<br>2.171(4)<br>1.958(4)<br>2.068(4) | 1.770(4)<br>1.829(4)                                                                         | 2.234(4)<br>2.113(4)                        | 1.979(4)<br>1.989(4)<br>1.971(4)<br>2.024(4) | 2.318(5) 2.111(6)<br>2.087(5) 2.327(5)<br>2.098(5) 2.084(6)<br>2.375(5) 2.117(5)<br>2.142(5) 2.358(5)<br>2.094(5) 2.138(5) |
| <b>8</b>              | 3.715<br>3.709<br>3.531 <sup>c</sup><br>3.324 <sup>c</sup><br>3.527 <sup>c</sup>                       | -----                                           | 1.972(3)<br>1.968(3)   | -----                                                                                        | 1.831(3)<br>1.955(3)<br>1.828(3)<br>1.832(3)<br>1.829(3)<br>1.955(3)<br>1.805(3)<br>1.812(3) | -----                                       | 1.999(3)<br>2.096(3)<br>2.002(3)<br>2.086(3) | 2.300(4) 2.100(4)<br>2.179(4) 2.297(4)<br>2.162(4) 2.170(4)<br>2.300(4) 2.171(4)<br>2.103(4) 2.296(4)<br>2.161(4) 2.147(4) |
| <b>9</b>              | 3.571<br>3.573<br>3.359 <sup>c</sup><br>3.553 <sup>c</sup><br>3.418 <sup>c</sup>                       | -----                                           | -----                  | -----                                                                                        | 2.035(3)<br>1.903(3)<br>1.910(3)<br>1.895(3)<br>2.014(3)                                     | -----                                       | 2.005(3)<br>2.016(3)<br>2.008(3)<br>2.024(3) | 2.266(4) 2.157(4)<br>2.111(4) 2.304(4)<br>2.134(4) 2.134(4)<br>2.301(4) 2.149(4)<br>2.122(4) 2.271(4)<br>2.117(4) 2.157(4) |
| <b>10<sup>f</sup></b> | -----                                                                                                  | -----                                           | -----                  | -----                                                                                        | -----                                                                                        | -----                                       | -----                                        | 2.144(2) 2.141(2)<br>2.297(3) 2.141(2)<br>2.144(2) 2.297(3)                                                                |
| <b>11</b>             | 3.575                                                                                                  | 2.065(12) <sup>d</sup><br>2.058(5) <sup>e</sup> | -----                  | -----                                                                                        | -----                                                                                        | -----                                       | 1.993(4)<br>2.004(4)                         | 2.348(5) 2.086(4)<br>2.096(5) 2.327(5)<br>2.061(6) 2.068(4)                                                                |
| <b>12</b>             | 3.595                                                                                                  | -----                                           | -----                  | 1.823(3)<br>1.817(3)                                                                         | -----                                                                                        | 2.028(3)<br>2.081(7)                        | 1.979(3)<br>2.002(3)                         | 2.262(3) 2.113(4)<br>2.074(3) 2.273(4)<br>2.090(4) 2.096(4)                                                                |

a, mono hydroxo bridged; b, di hydroxo bridged; c, oxo bridged; d, acetamide O; e, acetamide N; f, Fe—N<sub>Ligand</sub> distances made equal by symmetry. † Fe—N(MeCN) distances (Å) in **2** = 2.227(3), 2.117(3), 2.241(3), 2.114(3); Fe—Cl distances (Å) in **6** = 2.2459(9), 2.2205(9), 2.3603(10). ‡ **5** contains two independent molecules with slightly different bond distances in its asymmetric unit. Distances for one of them are shown here.

**Table S2. Selected Angles (Deg).**

|           | Fe—O—Fe                 | Fe—O <sub>μ-OH</sub> —Fe | Fe—O <sub>μ-O</sub> —Fe |
|-----------|-------------------------|--------------------------|-------------------------|
| <b>1</b>  | 131.56(10)              | -----                    | -----                   |
| <b>2</b>  | 130.54(9)               | -----                    | -----                   |
| <b>3</b>  | 125.09(18)              | -----                    | -----                   |
| <b>4</b>  | 122.31(8)               | -----                    | -----                   |
| <b>5</b>  | 128.06(10)              | -----                    | -----                   |
|           | 128.15(10) <sup>†</sup> | -----                    | -----                   |
| <b>6</b>  | 134.46(11)              | -----                    | -----                   |
|           |                         | 132.2(2)                 |                         |
| <b>7</b>  | 125.7(2)                | 131.4(2)                 | 136.5(2)                |
|           | 123.7(2)                | 97.17(17)                |                         |
|           |                         | 100.60(18)               |                         |
| <b>8</b>  | 130.23(15)              | -----                    | 137.65(16)              |
|           | 130.27(15)              |                          | 130.53(18)              |
|           |                         |                          | 137.55(17)              |
|           |                         |                          | 136.46(18)              |
| <b>9</b>  | 125.25(15)              | -----                    | 131.09(14)              |
|           | 124.77(14)              |                          | 127.42(15)              |
|           |                         |                          | 130.63(14)              |
| <b>11</b> | 126.87(18)              | -----                    |                         |
| <b>12</b> | 129.12(15)              | -----                    | -----                   |

<sup>†</sup>5 contains two independent molecules with slightly different bond distances in its asymmetric unit.

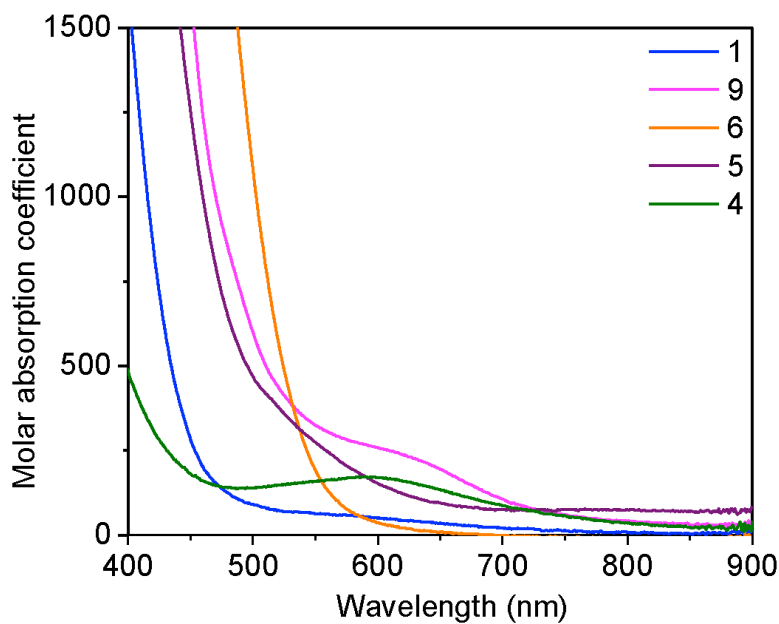**Figure S1.** Electronic absorption spectroscopic signatures for selected compounds.

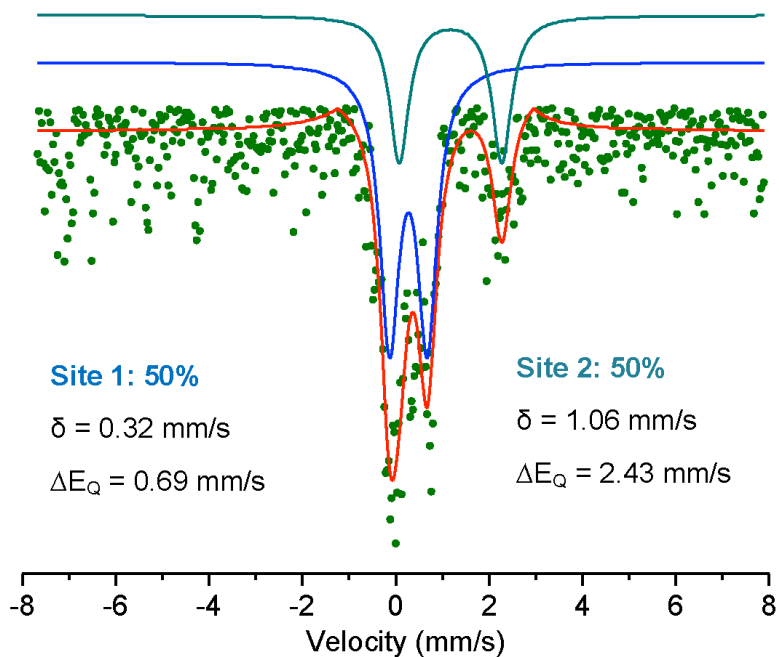

**Figure S2.**  $^{57}\text{Fe}$  Mössbauer spectra of **5** at r.t.

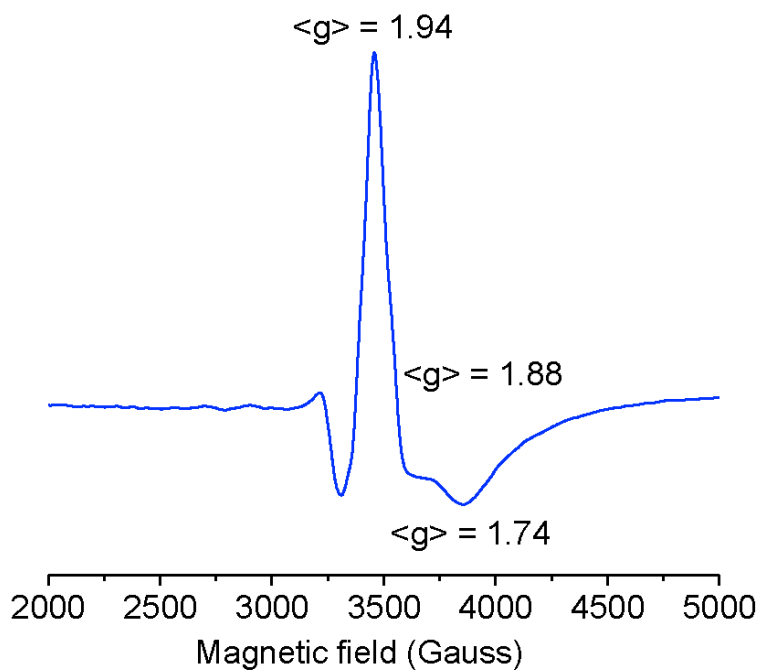

**Figure S3.** EPR spectra of **5** in DMF/MeCN (1:1) at 4K. Conditions: [**5**] = 0.2 mM, 9.39 GHz MW frequency, 20 mW micro-wave power, 10 G modulation amplitude, and 0.2 s time constant.
